# Supplementary material for: Efficiency of a Seedling Phenotyping Strategy to Support European Wheat Breeding Focusing on Leaf Rust Resistance
Source: MDPI journal article supplement (doi:10.3390/biology10070628), 2021-07-06
Supplement: s1 [file s1]

## Supplementary Material

**Table S1.** Results of leaf rust screening of 232 winter wheat lines and susceptible control *Borenos*. Phenotyping in the field was realized after flowering (EC65) following an ordinal scale of increasing infestation from 1 to 9. The whole genotype set was examined within greenhouse trials as two leaf seedlings (EC 12; T1). In addition, a limited set of 40 genotypes was tested five weeks (EC 19; T2), and ten weeks (EC 25; T3) after sowing. Columns T1, T2, and T3 give the percentage of infected leaf area based on detached leaf assays. Best linear unbiased estimations (BLUEs) were predicted for each plant developmental stage (T1-T3), while the belonging standard errors are also given.

| Genotype | Field | T1   | Standard Error<br>(Predicting T1) | T2    | Standard Error<br>(Predicting T2) | T3   | Standard Error<br>(Predicting T3) |
|----------|-------|------|-----------------------------------|-------|-----------------------------------|------|-----------------------------------|
| Borenos  | -     | 2.54 | 0.59                              | 12.62 | 1.10                              | 4.47 | 1.04                              |
| Line 1   | -0.09 | 0.63 | 0.88                              | 0.31  | 2.02                              | 0.55 | 1.33                              |
| Line 2   | 0.24  | 0.71 | 0.88                              | 0.31  | 2.02                              | 0.59 | 1.33                              |
| Line 3   | 0.24  | 0.63 | 0.88                              | 0.31  | 2.02                              | 0.77 | 1.33                              |
| Line 4   | 0.27  | 0.71 | 0.88                              | 0.37  | 2.02                              | 0.55 | 1.33                              |
| Line 5   | 0.52  | 1.01 | 0.88                              | 0.31  | 2.02                              | 0.59 | 1.33                              |
| Line 6   | 0.58  | 0.71 | 0.88                              | 0.31  | 2.02                              | 0.99 | 1.51                              |
| Line 7   | 0.58  | 1.32 | 0.88                              | 4.52  | 2.02                              | 1.53 | 1.33                              |
| Line 8   | 0.58  | 0.74 | 0.88                              | 0.31  | 2.02                              | 0.55 | 1.33                              |
| Line 9   | 0.58  | 0.68 | 0.88                              | 0.31  | 2.02                              | 0.55 | 1.33                              |
| Line 10  | 0.91  | 0.58 | 0.88                              | 0.31  | 2.02                              | 0.55 | 1.33                              |
| Line 11  | 0.91  | 0.63 | 0.88                              | 0.31  | 2.02                              | 0.55 | 1.33                              |
| Line 12  | 1.02  | 1.03 | 0.88                              | 2.87  | 2.02                              | 1.03 | 1.33                              |
| Line 13  | 1.02  | 1.13 | 0.88                              | 7.38  | 2.02                              | 0.73 | 1.33                              |
| Line 14  | 1.02  | 0.95 | 0.88                              | 0.31  | 2.02                              | 0.55 | 1.33                              |
| Line 15  | 1.52  | 0.89 | 0.88                              | 0.31  | 2.02                              | 0.55 | 1.33                              |
| Line 16  | 1.52  | 0.89 | 0.88                              | 0.44  | 2.02                              | 0.59 | 1.33                              |
| Line 17  | 1.52  | 0.96 | 0.88                              | 0.45  | 2.02                              | 0.55 | 1.33                              |
| Line 18  | 1.52  | 1.03 | 0.88                              | 6.92  | 2.02                              | 1.03 | 1.33                              |
| Line 19  | 1.58  | 0.58 | 0.88                              | 0.37  | 2.02                              | 0.55 | 1.33                              |
| Line 20  | 2.17  | 1.04 | 0.88                              | 1.62  | 2.02                              | 0.70 | 1.33                              |
| Line 21  | 5.40  | 1.68 | 0.88                              | 6.49  | 2.02                              | 0.84 | 1.33                              |
| Line 22  | 5.40  | 0.92 | 0.88                              | 0.77  | 2.02                              | 0.59 | 1.33                              |
| Line 23  | 6.24  | 1.79 | 0.88                              | 3.73  | 2.02                              | 1.30 | 1.33                              |
| Line 24  | 6.58  | 2.06 | 0.88                              | 26.67 | 2.02                              | 5.51 | 1.33                              |
| Line 25  | 6.58  | 1.31 | 0.88                              | 4.65  | 2.02                              | 1.21 | 1.33                              |
| Line 26  | 6.58  | 0.63 | 0.88                              | 0.31  | 2.02                              | 0.99 | 1.33                              |
| Line 27  | 6.58  | 0.76 | 0.88                              | 1.23  | 2.02                              | 0.59 | 1.33                              |
| Line 28  | 6.58  | 2.10 | 0.88                              | 12.12 | 2.02                              | 1.46 | 1.33                              |
| Line 29  | 6.58  | 1.64 | 0.88                              | 3.40  | 2.02                              | 1.93 | 1.33                              |
| Line 30  | 6.63  | 1.01 | 0.88                              | 4.45  | 2.02                              | 0.73 | 1.33                              |
| Line 31  | 6.80  | 0.96 | 0.93                              | 2.48  | 2.02                              | 0.55 | 1.33                              |

| <b>Genotype</b> | <b>Field</b> | <b>T1</b> | <b>Standard Error<br/>(Predicting T1)</b> | <b>T2</b> | <b>Standard Error<br/>(Predicting T2)</b> | <b>T3</b> | <b>Standard Error<br/>(Predicting T3)</b> |
|-----------------|--------------|-----------|-------------------------------------------|-----------|-------------------------------------------|-----------|-------------------------------------------|
| Line 32         | 6.91         | 0.63      | 0.88                                      | 0.37      | 2.02                                      | 0.59      | 1.33                                      |
| Line 33         | 6.91         | 0.63      | 0.88                                      | 0.31      | 2.02                                      | 0.55      | 1.33                                      |
| Line 34         | 6.91         | 0.73      | 0.88                                      | 0.90      | 2.02                                      | 0.60      | 1.33                                      |
| Line 35         | 6.91         | 1.79      | 0.88                                      | 3.00      | 2.02                                      | 0.88      | 1.33                                      |
| Line 36         | 6.91         | 0.74      | 0.88                                      | 0.70      | 2.02                                      | 0.55      | 1.33                                      |
| Line 37         | 6.91         | 0.58      | 0.88                                      | 0.31      | 2.02                                      | 0.55      | 1.33                                      |
| Line 38         | 7.24         | 1.93      | 0.88                                      | 18.79     | 2.02                                      | 2.46      | 1.33                                      |
| Line 39         | 7.24         | 2.43      | 0.88                                      | 22.74     | 2.02                                      | 5.15      | 1.33                                      |
| Line 40         | 7.58         | 1.82      | 0.88                                      | 4.19      | 2.02                                      | 1.13      | 1.33                                      |
| Line 41         | 5.91         | 0.79      | 0.88                                      | -         | -                                         | 0.54      | 1.51                                      |
| Line 42         | 0.24         | 0.71      | 0.88                                      | -         | -                                         | -         | -                                         |
| Line 43         | 0.24         | 0.63      | 0.88                                      | -         | -                                         | -         | -                                         |
| Line 44         | 0.24         | 0.58      | 0.88                                      | -         | -                                         | -         | -                                         |
| Line 45         | 0.24         | 0.63      | 0.88                                      | -         | -                                         | -         | -                                         |
| Line 46         | 0.24         | 0.58      | 0.88                                      | -         | -                                         | -         | -                                         |
| Line 47         | 0.24         | 0.58      | 0.88                                      | -         | -                                         | -         | -                                         |
| Line 48         | 0.24         | 0.63      | 0.88                                      | -         | -                                         | -         | -                                         |
| Line 49         | 0.29         | 0.93      | 0.88                                      | -         | -                                         | -         | -                                         |
| Line 50         | 0.52         | 0.96      | 0.93                                      | -         | -                                         | -         | -                                         |
| Line 51         | 0.58         | 0.63      | 0.88                                      | -         | -                                         | -         | -                                         |
| Line 52         | 0.58         | 0.61      | 0.88                                      | -         | -                                         | -         | -                                         |
| Line 53         | 0.58         | 0.58      | 0.88                                      | -         | -                                         | -         | -                                         |
| Line 54         | 0.58         | 0.66      | 0.88                                      | -         | -                                         | -         | -                                         |
| Line 55         | 0.58         | 0.66      | 0.88                                      | -         | -                                         | -         | -                                         |
| Line 56         | 0.58         | 0.60      | 0.88                                      | -         | -                                         | -         | -                                         |
| Line 57         | 0.58         | 0.58      | 0.88                                      | -         | -                                         | -         | -                                         |
| Line 58         | 0.58         | 0.58      | 0.88                                      | -         | -                                         | -         | -                                         |
| Line 59         | 0.58         | 0.58      | 0.88                                      | -         | -                                         | -         | -                                         |
| Line 60         | 0.62         | 0.95      | 0.88                                      | -         | -                                         | -         | -                                         |
| Line 61         | 0.62         | 0.88      | 0.88                                      | -         | -                                         | -         | -                                         |
| Line 62         | 0.62         | 0.91      | 0.88                                      | -         | -                                         | -         | -                                         |
| Line 63         | 0.91         | 0.71      | 0.88                                      | -         | -                                         | -         | -                                         |
| Line 64         | 0.91         | 0.58      | 0.88                                      | -         | -                                         | -         | -                                         |
| Line 65         | 0.91         | 0.60      | 0.88                                      | -         | -                                         | -         | -                                         |
| Line 66         | 0.91         | 0.66      | 0.88                                      | -         | -                                         | -         | -                                         |
| Line 67         | 0.91         | 0.64      | 0.88                                      | -         | -                                         | -         | -                                         |
| Line 68         | 0.91         | 0.72      | 0.88                                      | -         | -                                         | -         | -                                         |
| Line 69         | 0.95         | 0.95      | 0.88                                      | -         | -                                         | -         | -                                         |
| Line 70         | 0.95         | 0.95      | 0.88                                      | -         | -                                         | -         | -                                         |
| Line 71         | 1.02         | 0.89      | 0.88                                      | -         | -                                         | -         | -                                         |

| <b>Genotype</b> | <b>Field</b> | <b>T1</b> | <b>Standard Error<br/>(Predicting T1)</b> | <b>T2</b> | <b>Standard Error<br/>(Predicting T2)</b> | <b>T3</b> | <b>Standard Error<br/>(Predicting T3)</b> |
|-----------------|--------------|-----------|-------------------------------------------|-----------|-------------------------------------------|-----------|-------------------------------------------|
| Line 72         | 1.02         | 0.89      | 0.88                                      | -         | -                                         | -         | -                                         |
| Line 73         | 1.02         | 0.96      | 0.88                                      | -         | -                                         | -         | -                                         |
| Line 74         | 1.02         | 1.00      | 0.88                                      | -         | -                                         | -         | -                                         |
| Line 75         | 1.02         | 0.91      | 0.88                                      | -         | -                                         | -         | -                                         |
| Line 76         | 1.02         | 0.96      | 0.88                                      | -         | -                                         | -         | -                                         |
| Line 77         | 1.02         | 0.96      | 0.88                                      | -         | -                                         | -         | -                                         |
| Line 78         | 1.02         | 0.96      | 0.88                                      | -         | -                                         | -         | -                                         |
| Line 79         | 1.02         | 0.96      | 0.88                                      | -         | -                                         | -         | -                                         |
| Line 80         | 1.02         | 0.91      | 0.88                                      | -         | -                                         | -         | -                                         |
| Line 81         | 1.02         | 0.91      | 0.88                                      | -         | -                                         | -         | -                                         |
| Line 82         | 1.02         | 0.91      | 0.88                                      | -         | -                                         | -         | -                                         |
| Line 83         | 1.02         | 0.88      | 0.88                                      | -         | -                                         | -         | -                                         |
| Line 84         | 1.24         | 0.72      | 0.88                                      | -         | -                                         | -         | -                                         |
| Line 85         | 1.29         | 0.96      | 0.88                                      | -         | -                                         | -         | -                                         |
| Line 86         | 1.52         | 1.01      | 0.88                                      | -         | -                                         | -         | -                                         |
| Line 87         | 1.52         | 0.96      | 0.88                                      | -         | -                                         | -         | -                                         |
| Line 88         | 1.52         | 0.91      | 0.88                                      | -         | -                                         | -         | -                                         |
| Line 89         | 1.52         | 0.95      | 0.88                                      | -         | -                                         | -         | -                                         |
| Line 90         | 1.52         | 0.91      | 0.88                                      | -         | -                                         | -         | -                                         |
| Line 91         | 1.52         | 0.95      | 0.88                                      | -         | -                                         | -         | -                                         |
| Line 92         | 1.52         | 0.95      | 0.88                                      | -         | -                                         | -         | -                                         |
| Line 93         | 1.52         | 0.88      | 0.88                                      | -         | -                                         | -         | -                                         |
| Line 94         | 1.67         | 0.72      | 0.88                                      | -         | -                                         | -         | -                                         |
| Line 95         | 1.83         | 0.80      | 0.88                                      | -         | -                                         | -         | -                                         |
| Line 96         | 1.83         | 0.72      | 0.88                                      | -         | -                                         | -         | -                                         |
| Line 97         | 2.02         | 1.06      | 0.93                                      | -         | -                                         | -         | -                                         |
| Line 98         | 2.02         | 0.95      | 0.88                                      | -         | -                                         | -         | -                                         |
| Line 99         | 2.02         | 1.03      | 0.93                                      | -         | -                                         | -         | -                                         |
| Line 100        | 2.18         | 0.72      | 0.88                                      | -         | -                                         | -         | -                                         |
| Line 101        | 2.20         | 0.92      | 0.88                                      | -         | -                                         | -         | -                                         |
| Line 102        | 2.29         | 0.95      | 0.88                                      | -         | -                                         | -         | -                                         |
| Line 103        | 2.29         | 0.92      | 0.88                                      | -         | -                                         | -         | -                                         |
| Line 104        | 2.29         | 0.95      | 0.88                                      | -         | -                                         | -         | -                                         |
| Line 105        | 2.52         | 1.09      | 0.88                                      | -         | -                                         | -         | -                                         |
| Line 106        | 2.62         | 0.88      | 0.88                                      | -         | -                                         | -         | -                                         |
| Line 107        | 2.62         | 0.95      | 0.88                                      | -         | -                                         | -         | -                                         |
| Line 108        | 2.62         | 0.88      | 0.88                                      | -         | -                                         | -         | -                                         |
| Line 109        | 2.62         | 0.88      | 0.88                                      | -         | -                                         | -         | -                                         |
| Line 110        | 2.62         | 0.93      | 0.88                                      | -         | -                                         | -         | -                                         |
| Line 111        | 2.77         | 0.90      | 0.88                                      | -         | -                                         | -         | -                                         |

| <b>Genotype</b> | <b>Field</b> | <b>T1</b> | <b>Standard Error<br/>(Predicting T1)</b> | <b>T2</b> | <b>Standard Error<br/>(Predicting T2)</b> | <b>T3</b> | <b>Standard Error<br/>(Predicting T3)</b> |
|-----------------|--------------|-----------|-------------------------------------------|-----------|-------------------------------------------|-----------|-------------------------------------------|
| Line 112        | 2.95         | 0.91      | 0.88                                      | -         | -                                         | -         | -                                         |
| Line 113        | 2.95         | 1.09      | 0.88                                      | -         | -                                         | -         | -                                         |
| Line 114        | 2.95         | 0.92      | 0.88                                      | -         | -                                         | -         | -                                         |
| Line 115        | 2.95         | 0.99      | 0.88                                      | -         | -                                         | -         | -                                         |
| Line 116        | 2.95         | 1.31      | 0.93                                      | -         | -                                         | -         | -                                         |
| Line 117        | 3.02         | 1.01      | 0.88                                      | -         | -                                         | -         | -                                         |
| Line 118        | 3.02         | 1.18      | 0.88                                      | -         | -                                         | -         | -                                         |
| Line 119        | 3.02         | 0.88      | 0.88                                      | -         | -                                         | -         | -                                         |
| Line 120        | 3.02         | 1.16      | 0.88                                      | -         | -                                         | -         | -                                         |
| Line 121        | 3.02         | 0.92      | 0.88                                      | -         | -                                         | -         | -                                         |
| Line 122        | 3.02         | 0.92      | 0.88                                      | -         | -                                         | -         | -                                         |
| Line 123        | 3.16         | 0.92      | 0.88                                      | -         | -                                         | -         | -                                         |
| Line 124        | 3.16         | 0.90      | 0.88                                      | -         | -                                         | -         | -                                         |
| Line 125        | 3.24         | 0.61      | 0.88                                      | -         | -                                         | -         | -                                         |
| Line 126        | 3.24         | 0.71      | 0.88                                      | -         | -                                         | -         | -                                         |
| Line 127        | 3.24         | 0.59      | 0.88                                      | -         | -                                         | -         | -                                         |
| Line 128        | 3.24         | 0.71      | 0.88                                      | -         | -                                         | -         | -                                         |
| Line 129        | 3.24         | 1.53      | 0.88                                      | -         | -                                         | -         | -                                         |
| Line 130        | 3.24         | 1.79      | 0.88                                      | -         | -                                         | -         | -                                         |
| Line 131        | 3.24         | 2.63      | 0.88                                      | -         | -                                         | -         | -                                         |
| Line 132        | 3.24         | 1.87      | 0.88                                      | -         | -                                         | -         | -                                         |
| Line 133        | 3.28         | 0.63      | 0.88                                      | -         | -                                         | -         | -                                         |
| Line 134        | 3.29         | 0.92      | 0.88                                      | -         | -                                         | -         | -                                         |
| Line 135        | 3.29         | 1.29      | 0.88                                      | -         | -                                         | -         | -                                         |
| Line 136        | 3.29         | 0.89      | 0.88                                      | -         | -                                         | -         | -                                         |
| Line 137        | 3.52         | 1.68      | 0.88                                      | -         | -                                         | -         | -                                         |
| Line 138        | 3.52         | 1.65      | 0.88                                      | -         | -                                         | -         | -                                         |
| Line 139        | 3.52         | 1.38      | 0.88                                      | -         | -                                         | -         | -                                         |
| Line 140        | 3.52         | 1.11      | 0.88                                      | -         | -                                         | -         | -                                         |
| Line 141        | 3.52         | 1.50      | 0.88                                      | -         | -                                         | -         | -                                         |
| Line 142        | 3.52         | 0.91      | 0.88                                      | -         | -                                         | -         | -                                         |
| Line 143        | 3.52         | 0.99      | 0.88                                      | -         | -                                         | -         | -                                         |
| Line 144        | 3.58         | 1.78      | 0.88                                      | -         | -                                         | -         | -                                         |
| Line 145        | 3.58         | 1.07      | 0.88                                      | -         | -                                         | -         | -                                         |
| Line 146        | 3.58         | 1.72      | 0.88                                      | -         | -                                         | -         | -                                         |
| Line 147        | 3.58         | 0.63      | 0.88                                      | -         | -                                         | -         | -                                         |
| Line 148        | 3.58         | 0.81      | 0.88                                      | -         | -                                         | -         | -                                         |
| Line 149        | 3.58         | 2.18      | 0.88                                      | -         | -                                         | -         | -                                         |
| Line 150        | 3.58         | 1.50      | 0.88                                      | -         | -                                         | -         | -                                         |
| Line 151        | 3.58         | 1.50      | 0.88                                      | -         | -                                         | -         | -                                         |

| <b>Genotype</b> | <b>Field</b> | <b>T1</b> | <b>Standard Error<br/>(Predicting T1)</b> | <b>T2</b> | <b>Standard Error<br/>(Predicting T2)</b> | <b>T3</b> | <b>Standard Error<br/>(Predicting T3)</b> |
|-----------------|--------------|-----------|-------------------------------------------|-----------|-------------------------------------------|-----------|-------------------------------------------|
| Line 152        | 3.58         | 0.73      | 0.88                                      | -         | -                                         | -         | -                                         |
| Line 153        | 3.58         | 2.25      | 0.88                                      | -         | -                                         | -         | -                                         |
| Line 154        | 3.58         | 0.74      | 0.88                                      | -         | -                                         | -         | -                                         |
| Line 155        | 3.58         | 0.62      | 0.88                                      | -         | -                                         | -         | -                                         |
| Line 156        | 3.58         | 0.60      | 0.88                                      | -         | -                                         | -         | -                                         |
| Line 157        | 3.58         | 0.64      | 0.88                                      | -         | -                                         | -         | -                                         |
| Line 158        | 3.58         | 2.25      | 0.88                                      | -         | -                                         | -         | -                                         |
| Line 159        | 3.58         | 0.85      | 0.88                                      | -         | -                                         | -         | -                                         |
| Line 160        | 3.62         | 1.09      | 0.88                                      | -         | -                                         | -         | -                                         |
| Line 161        | 3.78         | 0.71      | 0.88                                      | -         | -                                         | -         | -                                         |
| Line 162        | 3.91         | 0.66      | 0.88                                      | -         | -                                         | -         | -                                         |
| Line 163        | 3.91         | 2.33      | 0.88                                      | -         | -                                         | -         | -                                         |
| Line 164        | 3.91         | 0.58      | 0.88                                      | -         | -                                         | -         | -                                         |
| Line 165        | 4.02         | 0.91      | 0.88                                      | -         | -                                         | -         | -                                         |
| Line 166        | 4.02         | 0.99      | 0.88                                      | -         | -                                         | -         | -                                         |
| Line 167        | 4.02         | 1.08      | 0.88                                      | -         | -                                         | -         | -                                         |
| Line 168        | 4.02         | 0.96      | 0.88                                      | -         | -                                         | -         | -                                         |
| Line 169        | 4.20         | 1.04      | 0.88                                      | -         | -                                         | -         | -                                         |
| Line 170        | 4.40         | 1.50      | 0.88                                      | -         | -                                         | -         | -                                         |
| Line 171        | 4.40         | 0.90      | 0.88                                      | -         | -                                         | -         | -                                         |
| Line 172        | 4.52         | 1.04      | 0.88                                      | -         | -                                         | -         | -                                         |
| Line 173        | 4.58         | 0.64      | 0.88                                      | -         | -                                         | -         | -                                         |
| Line 174        | 4.62         | 0.88      | 0.88                                      | -         | -                                         | -         | -                                         |
| Line 175        | 4.62         | 1.45      | 0.88                                      | -         | -                                         | -         | -                                         |
| Line 176        | 4.63         | 0.98      | 0.88                                      | -         | -                                         | -         | -                                         |
| Line 177        | 4.63         | 0.96      | 0.88                                      | -         | -                                         | -         | -                                         |
| Line 178        | 4.67         | 0.73      | 0.88                                      | -         | -                                         | -         | -                                         |
| Line 179        | 4.70         | 0.90      | 0.88                                      | -         | -                                         | -         | -                                         |
| Line 180        | 4.80         | 0.96      | 0.88                                      | -         | -                                         | -         | -                                         |
| Line 181        | 4.83         | 0.72      | 0.88                                      | -         | -                                         | -         | -                                         |
| Line 182        | 4.83         | 2.06      | 0.88                                      | -         | -                                         | -         | -                                         |
| Line 183        | 4.95         | 1.19      | 0.88                                      | -         | -                                         | -         | -                                         |
| Line 184        | 4.95         | 1.35      | 0.88                                      | -         | -                                         | -         | -                                         |
| Line 185        | 4.95         | 0.97      | 0.88                                      | -         | -                                         | -         | -                                         |
| Line 186        | 4.98         | 1.06      | 0.88                                      | -         | -                                         | -         | -                                         |
| Line 187        | 5.00         | 0.92      | 0.88                                      | -         | -                                         | -         | -                                         |
| Line 188        | 5.00         | 0.72      | 0.88                                      | -         | -                                         | -         | -                                         |
| Line 189        | 5.02         | 1.01      | 0.88                                      | -         | -                                         | -         | -                                         |
| Line 190        | 5.17         | 1.32      | 0.88                                      | -         | -                                         | -         | -                                         |
| Line 191        | 5.20         | 0.96      | 0.88                                      | -         | -                                         | -         | -                                         |

| <b>Genotype</b> | <b>Field</b> | <b>T1</b> | <b>Standard Error<br/>(Predicting T1)</b> | <b>T2</b> | <b>Standard Error<br/>(Predicting T2)</b> | <b>T3</b> | <b>Standard Error<br/>(Predicting T3)</b> |
|-----------------|--------------|-----------|-------------------------------------------|-----------|-------------------------------------------|-----------|-------------------------------------------|
| Line 192        | 5.29         | 1.64      | 0.88                                      | -         | -                                         | -         | -                                         |
| Line 193        | 5.29         | 1.13      | 0.88                                      | -         | -                                         | -         | -                                         |
| Line 194        | 5.29         | 1.56      | 0.88                                      | -         | -                                         | -         | -                                         |
| Line 195        | 5.29         | 1.58      | 0.88                                      | -         | -                                         | -         | -                                         |
| Line 196        | 5.37         | 0.98      | 0.88                                      | -         | -                                         | -         | -                                         |
| Line 197        | 5.37         | 1.15      | 0.88                                      | -         | -                                         | -         | -                                         |
| Line 198        | 5.41         | 0.94      | 0.88                                      | -         | -                                         | -         | -                                         |
| Line 199        | 5.52         | 1.13      | 0.93                                      | -         | -                                         | -         | -                                         |
| Line 200        | 5.52         | 2.16      | 0.88                                      | -         | -                                         | -         | -                                         |
| Line 201        | 5.54         | 0.92      | 0.88                                      | -         | -                                         | -         | -                                         |
| Line 202        | 5.78         | 1.87      | 0.88                                      | -         | -                                         | -         | -                                         |
| Line 203        | 5.78         | 1.96      | 0.88                                      | -         | -                                         | -         | -                                         |
| Line 204        | 5.87         | 1.63      | 0.88                                      | -         | -                                         | -         | -                                         |
| Line 205        | 5.88         | 0.97      | 0.88                                      | -         | -                                         | -         | -                                         |
| Line 206        | 5.91         | 0.63      | 0.88                                      | -         | -                                         | -         | -                                         |
| Line 207        | 5.91         | 0.60      | 0.88                                      | -         | -                                         | -         | -                                         |
| Line 208        | 5.91         | 2.22      | 0.88                                      | -         | -                                         | -         | -                                         |
| Line 209        | 5.91         | 0.60      | 0.88                                      | -         | -                                         | -         | -                                         |
| Line 210        | 5.91         | 0.66      | 0.88                                      | -         | -                                         | -         | -                                         |
| Line 211        | 5.91         | 2.40      | 0.88                                      | -         | -                                         | -         | -                                         |
| Line 212        | 5.91         | 1.26      | 0.88                                      | -         | -                                         | -         | -                                         |
| Line 213        | 5.91         | 1.02      | 0.88                                      | -         | -                                         | -         | -                                         |
| Line 214        | 5.95         | 1.10      | 0.88                                      | -         | -                                         | -         | -                                         |
| Line 215        | 6.02         | 1.23      | 0.88                                      | -         | -                                         | -         | -                                         |
| Line 216        | 6.24         | 2.44      | 0.88                                      | -         | -                                         | -         | -                                         |
| Line 217        | 6.24         | 2.68      | 0.88                                      | -         | -                                         | -         | -                                         |
| Line 218        | 6.24         | 1.48      | 0.88                                      | -         | -                                         | -         | -                                         |
| Line 219        | 6.24         | 1.81      | 0.88                                      | -         | -                                         | -         | -                                         |
| Line 220        | 6.24         | 0.66      | 0.88                                      | -         | -                                         | -         | -                                         |
| Line 221        | 6.24         | 0.66      | 0.88                                      | -         | -                                         | -         | -                                         |
| Line 222        | 6.24         | 1.33      | 0.88                                      | -         | -                                         | -         | -                                         |
| Line 223        | 6.24         | 0.60      | 0.88                                      | -         | -                                         | -         | -                                         |
| Line 224        | 6.24         | 0.86      | 0.88                                      | -         | -                                         | -         | -                                         |
| Line 225        | 6.24         | 0.58      | 0.88                                      | -         | -                                         | -         | -                                         |
| Line 226        | 6.24         | 0.76      | 0.88                                      | -         | -                                         | -         | -                                         |
| Line 227        | 6.24         | 0.72      | 0.88                                      | -         | -                                         | -         | -                                         |
| Line 228        | 6.24         | 1.94      | 0.88                                      | -         | -                                         | -         | -                                         |
| Line 229        | 6.29         | 1.13      | 0.88                                      | -         | -                                         | -         | -                                         |
| Line 230        | 6.52         | 0.89      | 0.88                                      | -         | -                                         | -         | -                                         |
| Line 231        | 6.52         | 1.27      | 0.88                                      | -         | -                                         | -         | -                                         |

| Genotype | Field | T1   | Standard Error<br>(Predicting T1) | T2 | Standard Error<br>(Predicting T2) | T3 | Standard Error<br>(Predicting T3) |
|----------|-------|------|-----------------------------------|----|-----------------------------------|----|-----------------------------------|
| Line 232 | 6.80  | 1.24 | 0.88                              | -  | -                                 | -  | -                                 |
| Line 233 | 7.02  | 0.98 | 0.88                              | -  | -                                 | -  | -                                 |

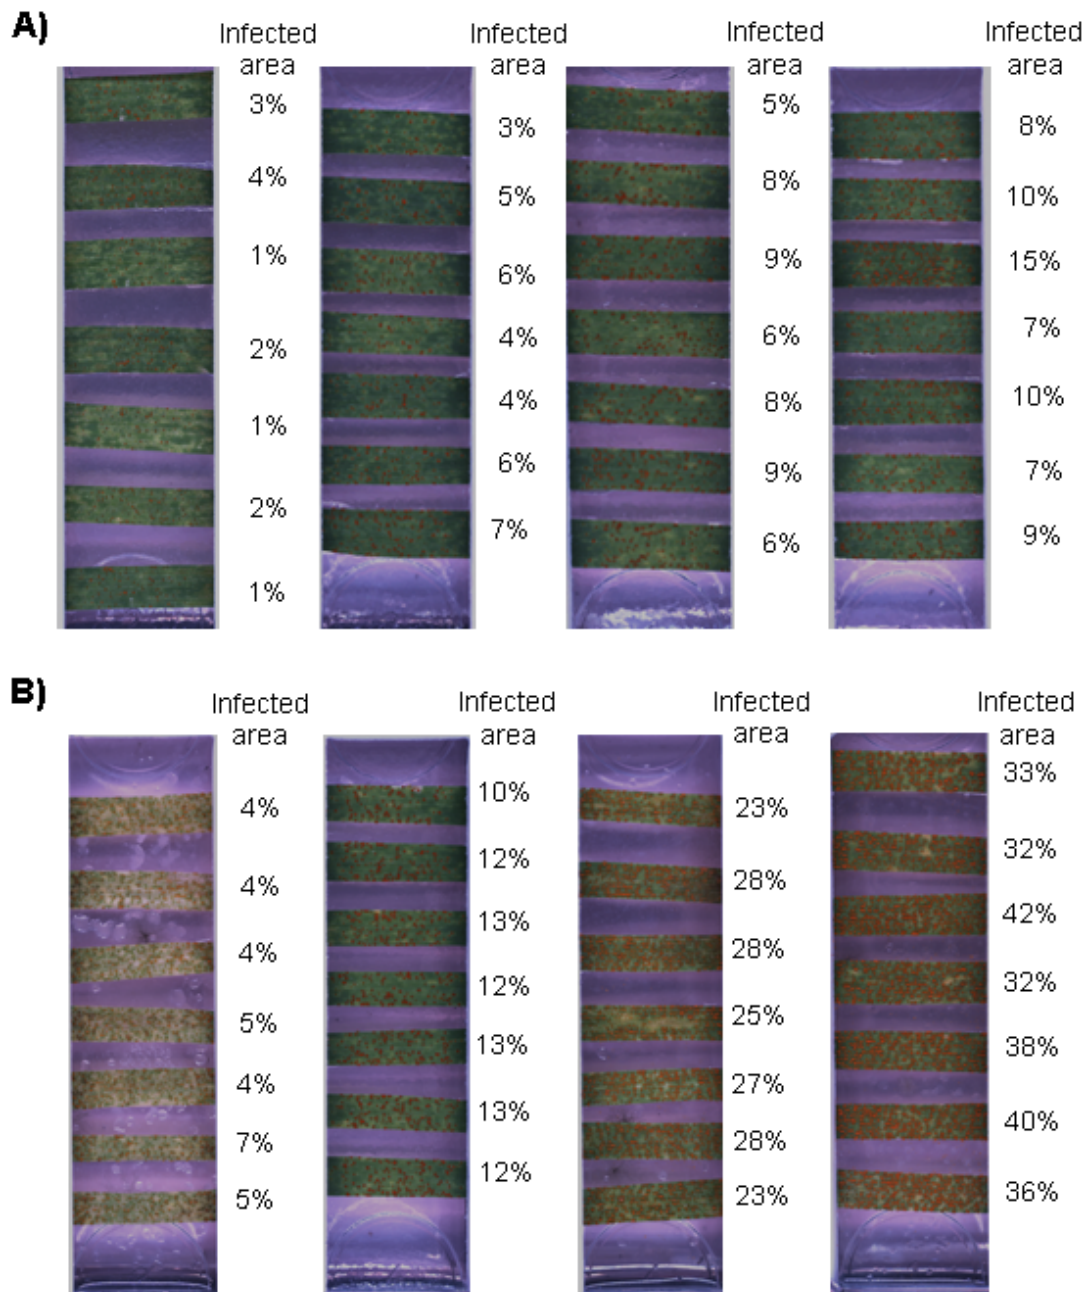

**Figure S1:** Example images of detached leaf assays to visualize the wide range of leaf rust infestation within greenhouse experiments. Each column includes the same genotype, while the given percentage of infected leaf area (Infected area) was analyzed by the BluVison software. Infestation data of tested wheat lines (**B**) were confronted with results of the susceptible control *Borenos* (**A**). For control means <2% infected leaf area per inoculation group, the whole inoculation group was excluded from statistical analyses.
